# Supplementary material for: Temporal Trends and Disparities in Suicidal Behaviors by Sex and Sexual Identity Among Asian American Adolescents
Source: PubMed Central journal article supplement (PMC8052595; doi:10.1001/jamanetworkopen.2021.4498), 2021-04-16

## Supplemental Online Content

Xiao Y, Lu W. Temporal trends and disparities in suicidal behaviors by sex and sexual identity among Asian American adolescents. *JAMA Netw Open*. 2021;4(4):e214498. doi:10.1001/jamanetworkopen.2021.4498

**eTable 1.** Sample Demographic Characteristics

**eTable 2.** Prevalence of Suicidal Behaviors by Sex (N = 7619)

**eTable 3.** Logistic Regressions of Trends in Suicidal Behaviors by Sex, Sexual Identity, and Intersectionality

**eFigure 1.** Annual Percentage Changes for Suicidal Behaviors

**eFigure 2.** Annual Percentage Changes for Suicidal Behaviors by Intersections of Sex and Sexual Identity

**eFigure 3.** Annual Percentage Changes for Suicidal Behaviors by Intersections of Sex and Sex of Sexual Contacts

**eFigure 4.** Annual Percentage Changes for Suicidal Behaviors by Intersections of Sexual Identity and Sex of Sexual Contacts

This supplemental material has been provided by the authors to give readers additional information about their work.

**eTable 1.** Sample Demographic Characteristics<sup>a</sup>

|                                | Sample A (1991-2019) |      | Sample B (2015-2019) |      |
|--------------------------------|----------------------|------|----------------------|------|
|                                | (n = 7619)           |      | (n = 1576)           |      |
| Sex, No. (%)                   |                      |      |                      |      |
| Male                           | 3859                 | 52.9 | 766                  | 50.8 |
| Female                         | 3760                 | 47.1 | 810                  | 49.2 |
| Sexual Identity, No. (%)       |                      |      |                      |      |
| Heterosexual                   |                      |      | 1380                 | 87.2 |
| Sexual Minority                |                      |      | 196                  | 12.8 |
| Sex of Sexual Contact, No. (%) |                      |      |                      |      |
| Never/Opposite Sex             |                      |      | 1516                 | 96.8 |
| Same/Both Sex                  |                      |      | 60                   | 3.2  |
| Grade Level, No. (%)           |                      |      |                      |      |
| 9th                            | 1814                 | 25.0 | 412                  | 26.3 |
| 10th                           | 1801                 | 25.5 | 358                  | 23.6 |
| 11th                           | 1943                 | 24.8 | 427                  | 24.6 |
| 12th                           | 2061                 | 24.7 | 379                  | 25.5 |

<sup>a</sup> No. is unweighted. % are weighted, incorporated survey weights that account for probabilities of sample selection, nonresponse and oversampling.

**eTable 2.** Prevalence of Suicidal Behaviors by Sex (N = 7619)<sup>a</sup>

|                                      | Suicidal Ideation |        |        | Suicide Plan |        |       | Suicide Attempt |        |        | Injury by Suicide Attempt |        |        |
|--------------------------------------|-------------------|--------|--------|--------------|--------|-------|-----------------|--------|--------|---------------------------|--------|--------|
|                                      | Total             | Female | Male   | Total        | Female | Male  | Total           | Female | Male   | Total                     | Female | Male   |
| <b>1991</b>                          | 34.4              | 47.4   | 21.9   | 24.7         | 35.8   | 14.3  | 12.5            | 15.5   | 9.7    | 1.3                       | 1.2    | 1.5    |
| <b>1993</b>                          | 24.9              | 29.3   | 21.6   | 18.9         | 19.4   | 18.6  | 9.3             | 14.7   | 5.3    | 1.5                       | 1.9    | 1.2    |
| <b>1995</b>                          | 20.1              | 29.2   | 14.1   | 19.1         | 24.1   | 15.8  | 7.6             | 7.5    | 7.5    | 0.3                       | 0.8    | 0.1    |
| <b>1997</b>                          | 21.1              | 25.6   | 17.5   | 16.0         | 19.1   | 13.7  | 6.9             | 11.4   | 3.3    | 1.5                       | 1.3    | 1.6    |
| <b>1999</b>                          | 21.7              | 28.8   | 15.6   | 17.9         | 27.3   | 10.0  | 7.0             | 9.3    | 5.1    | 1.9                       | 3.8    | 0.3    |
| <b>2001</b>                          | 18.5              | 22.5   | 14.5   | 18.1         | 24.8   | 11.4  | 10.0            | 13.0   | 7.0    | 2.4                       | 2.9    | 1.8    |
| <b>2003</b>                          | 21.2              | 27.5   | 16.2   | 24.5         | 30.8   | 19.4  | 14.0            | 18.6   | 10.0   | 5.6                       | 6.5    | 5.0    |
| <b>2005</b>                          | 15.9              | 20.4   | 11.9   | 13.3         | 15.7   | 11.3  | 6.9             | 9.4    | 4.9    | 1.9                       | 3.0    | 1.1    |
| <b>2007</b>                          | 11.2              | 13.7   | 9.1    | 10.8         | 11.2   | 10.5  | 5.6             | 5.0    | 6.2    | 2.1                       | 2.0    | 2.3    |
| <b>2009</b>                          | 14.9              | 16.9   | 12.9   | 12.6         | 14.7   | 10.4  | 4.0             | 3.7    | 4.3    | 1.4                       | 0.7    | 2.0    |
| <b>2011</b>                          | 18.9              | 21.1   | 17.1   | 14.4         | 15.6   | 13.3  | 10.8            | 15.0   | 7.0    | 4.5                       | 5.1    | 4.0    |
| <b>2013</b>                          | 16.7              | 22.9   | 10.2   | 15.8         | 17.9   | 13.5  | 9.5             | 11.7   | 7.1    | 3.7                       | 3.3    | 4.1    |
| <b>2015</b>                          | 17.7              | 21.3   | 14.9   | 13.8         | 19.7   | 8.9   | 7.8             | 11.1   | 5.2    | 1.5                       | 2.4    | 0.6    |
| <b>2017</b>                          | 17.4              | 17.8   | 17.0   | 16.1         | 18.3   | 13.7  | 5.7             | 8.4    | 2.7    | 2.7                       | 4.0    | 1.2    |
| <b>2019</b>                          | 19.7              | 22.0   | 17.3   | 16.1         | 19.2   | 13.0  | 7.7             | 8.4    | 7.1    | 1.7                       | 1.9    | 1.4    |
| <b>Changes 1991-2019<sup>b</sup></b> | -42.6%            | -53.6% | -21.2% | -34.5%       | -46.3% | -8.7% | -38.1%          | -45.7% | -26.9% | 24.1%                     | 58.9%  | -3.4%  |
| <b>Changes 2009-2019<sup>b</sup></b> | 32.0%             | 29.8%  | 34.1%  | 28.2%        | 30.7%  | 24.9% | 94.4%           | 126.8% | 67.4%  | 22.4%                     | 165.3% | -29.7% |

<sup>a</sup> Weighted percentages.

<sup>b</sup> Percent changes.

**eTable 3.** Logistic Regressions of Trends in Suicidal Behaviors by Sex, Sexual Identity, and Intersectionality<sup>a</sup>

|                                                | Suicidal Ideation |            | Suicide Plan |           | Suicide Attempts |            | Injury by Suicide |           |
|------------------------------------------------|-------------------|------------|--------------|-----------|------------------|------------|-------------------|-----------|
|                                                | Adjusted OR       | 95% CI     | Adjusted OR  | 95% CI    | Adjusted OR      | 95% CI     | Adjusted OR       | 95% CI    |
| <b>Sex</b>                                     |                   |            |              |           |                  |            |                   |           |
| Female (Ref.=Male)                             | 0.96**            | 0.93-0.99  | 0.98         | 0.94-1.02 | 0.98             | 0.93-1.04  | 0.99              | 0.89-1.09 |
| <b>Sexual Identity</b>                         |                   |            |              |           |                  |            |                   |           |
| Sexual Minority (Ref.=Heterosexual)            | 1.42              | 0.96-2.09  | 0.81         | 0.55-1.21 | 1.10             | 0.54-2.25  | 0.54              | 0.15-1.96 |
| <b>Sex of Sexual Contact</b>                   |                   |            |              |           |                  |            |                   |           |
| Same/Both Sex (Ref.=Never/Opposite Sex)        | 1.61              | 0.71-3.62  | 1.29         | 0.56-2.95 | 1.63             | 0.63-4.24  | 1.32              | 0.39-4.51 |
| <b>Sex x Sexual Identity</b>                   |                   |            |              |           |                  |            |                   |           |
| Sexual Minority Male                           | 1.29              | 0.61-2.74  | 0.94         | 0.38-2.29 | 1.49             | 0.44-5.07  | 0.16              | 0.02-1.15 |
| Heterosexual Female                            | 0.86              | 0.57-1.30  | 0.82         | 0.50-1.35 | 0.82             | 0.35-1.95  | 0.36              | 0.08-1.69 |
| Sexual Minority Female                         | 1.34              | 0.80-2.27  | 0.65         | 0.39-1.10 | 0.84             | 0.31-2.25  | 0.29              | 0.04-2.13 |
| <b>Sex x Sex of Sexual Contact</b>             |                   |            |              |           |                  |            |                   |           |
| Same/Both Sex Male                             | 3.64*             | 1.23-10.72 | 2.61         | 0.77-8.87 | 1.41             | 0.21-9.58  | NA                | NA        |
| Never/Opposite Sex Female                      | 1.07              | 0.71-1.61  | 0.94         | 0.56-1.56 | 0.79             | 0.36-1.75  | 0.26              | 0.05-1.30 |
| Same/Both Sex Female                           | 1.18              | 0.38-3.65  | 0.97         | 0.33-2.91 | 1.75             | 0.49-6.23  | 0.71              | 0.11-4.58 |
| <b>Sexual Identity x Sex of Sexual Contact</b> |                   |            |              |           |                  |            |                   |           |
| Same/Both Sex Heterosexual Male                | 3.28              | 0.92-11.78 | 1.98         | 0.51-7.75 | 2.71             | 0.66-11.05 | 2.17              | 0.50-9.35 |
| Never/Opposite Sex Sexual Minority             | 1.74*             | 1.13-2.67  | 0.88         | 0.57-1.34 | 1.13             | 0.48-2.63  | 1.00              | 1.00-1.00 |
| Same/Both Sex Sexual Minority                  | 2.51              | 0.98-6.42  | 1.40         | 0.48-4.11 | 1.49             | 0.51-4.35  | 0.84              | 0.18-3.92 |

Note. OR, odds ratio; 95% CI, 95% confidence interval. Ref., reference. NA, not applicable. The significance threshold was  $P < .05$  and the testing was 2-sided. All models controlled for the grade levels. All estimates shown were based on a series of models with interactions between each demographic characteristic and the survey year terms to determine whether trends of suicidal behaviors over time differed between demographic subgroups. All analyses incorporated the complex sampling design and survey weight to obtain the US nationally representative estimates, accounting for probabilities of sample selection, survey nonresponse, and oversampling of Black and Hispanic students.

**eFigure 1. Annual Percentage Changes for Suicidal Behaviors**

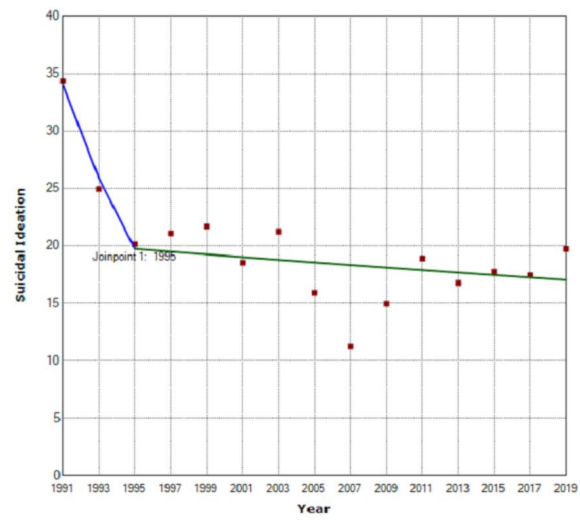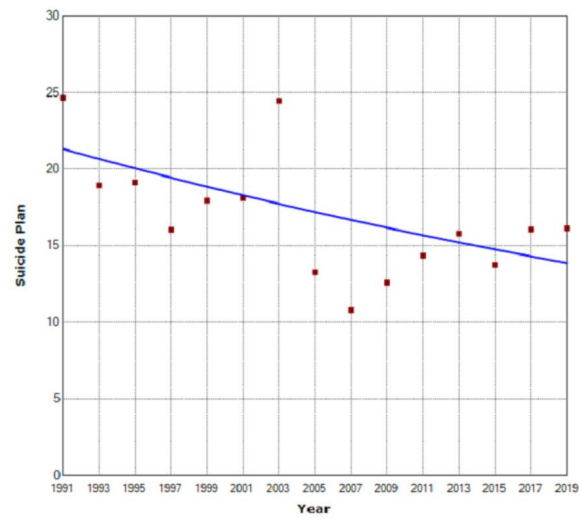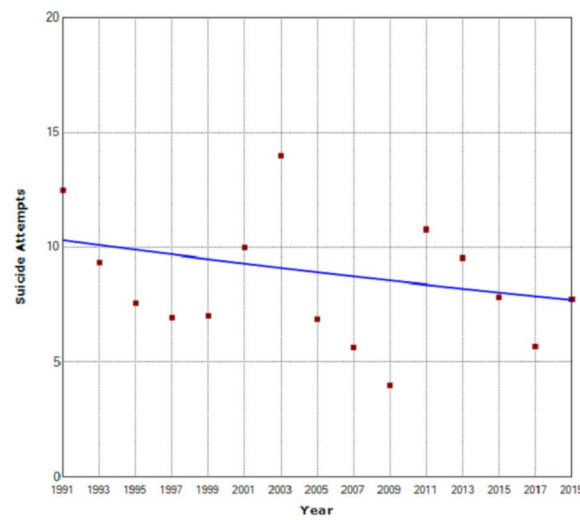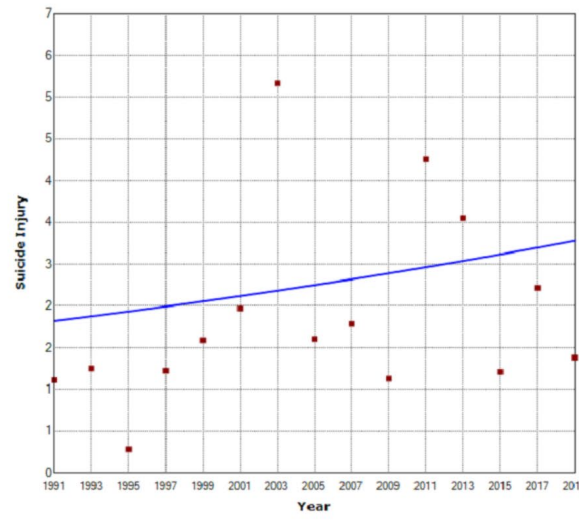

**eFigure 2.** Annual Percentage Changes for Suicidal Behaviors by Intersections of Sex and Sexual Identity

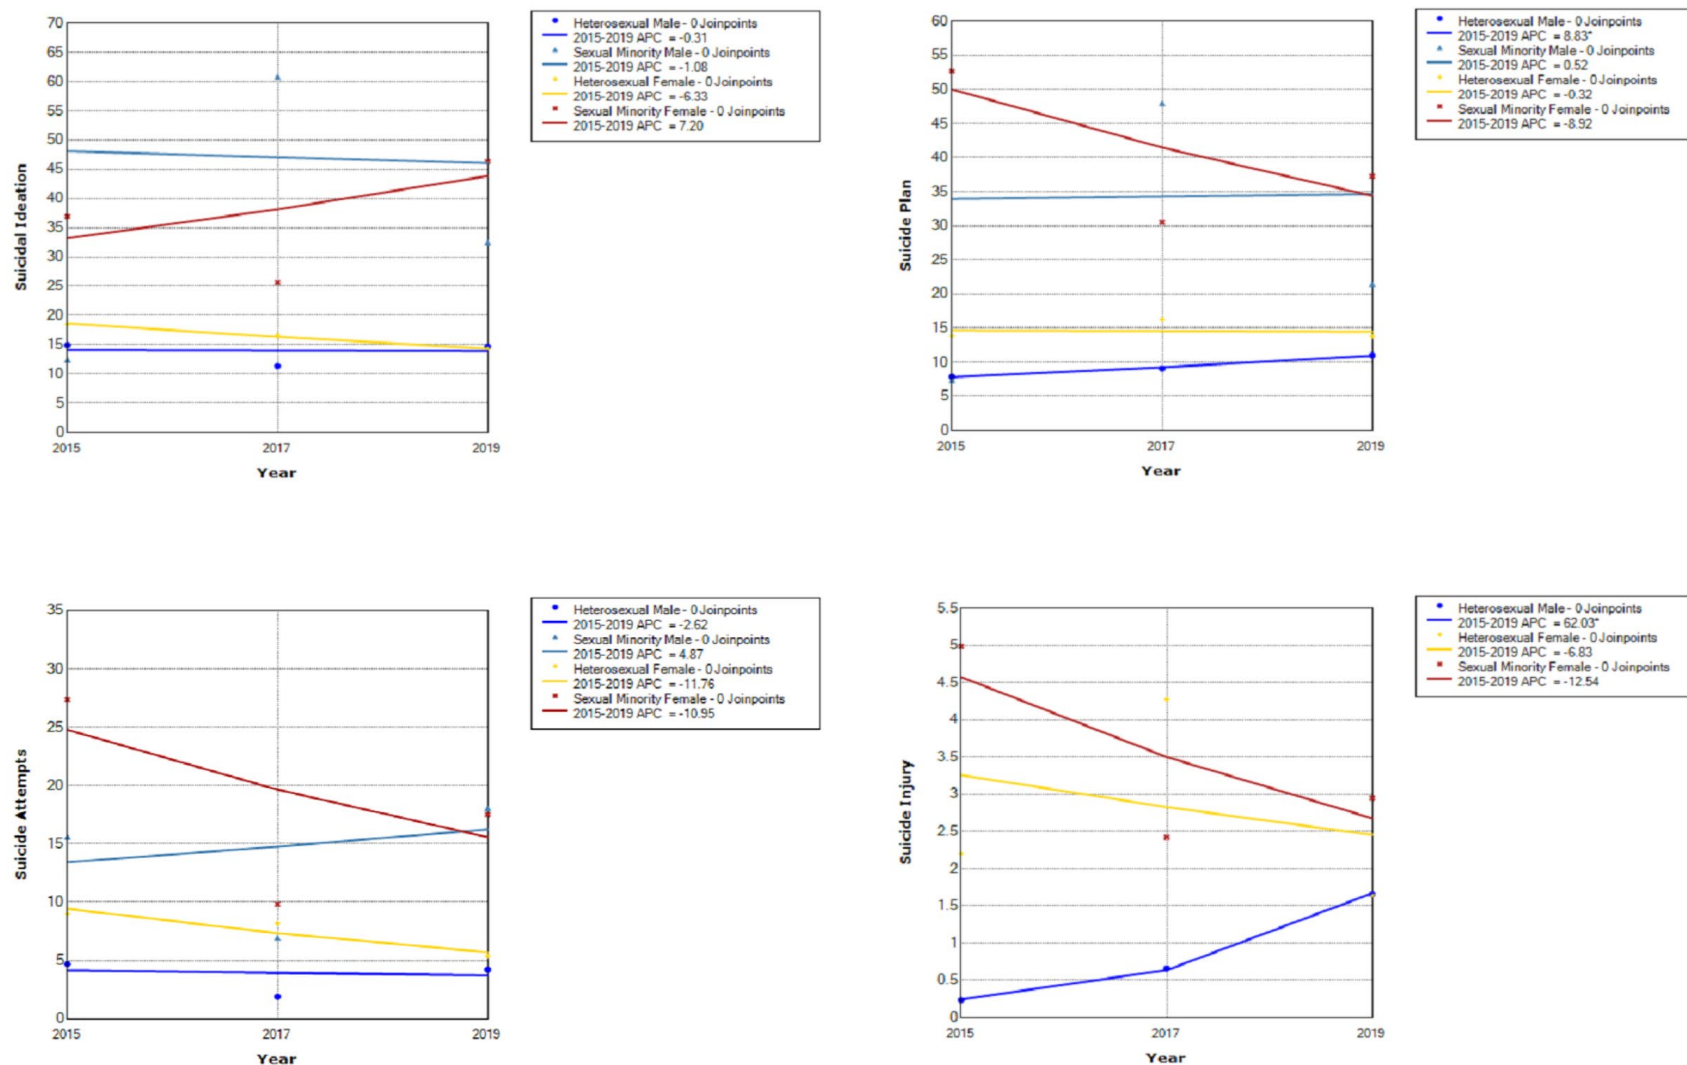

**eFigure 3.** Annual Percentage Changes for Suicidal Behaviors by Intersections of Sex and Sex of Sexual Contacts

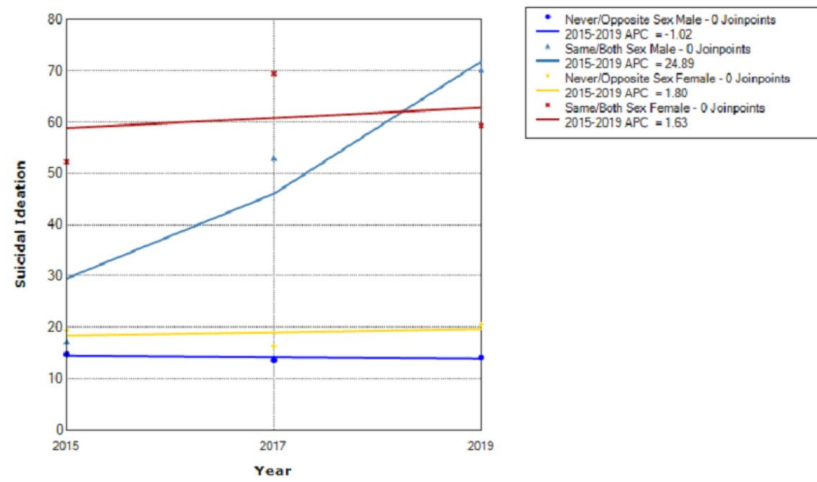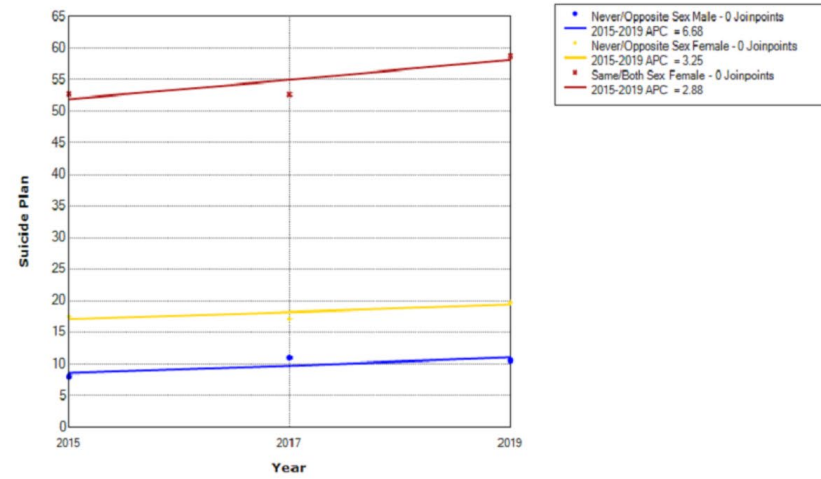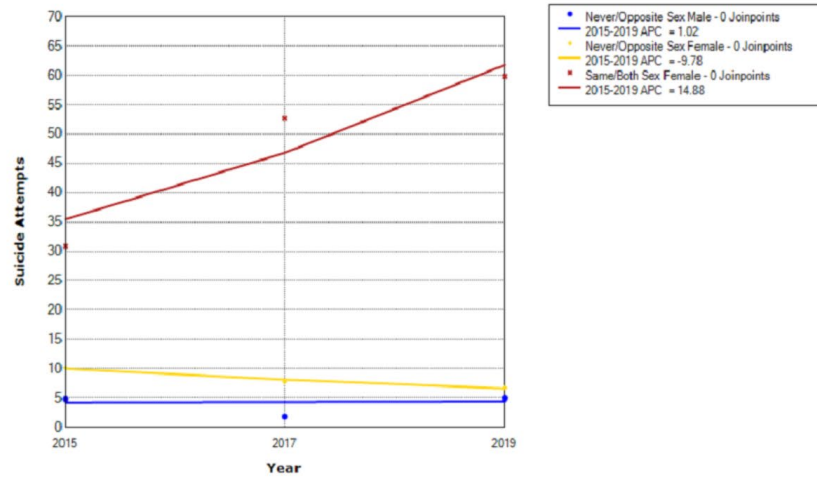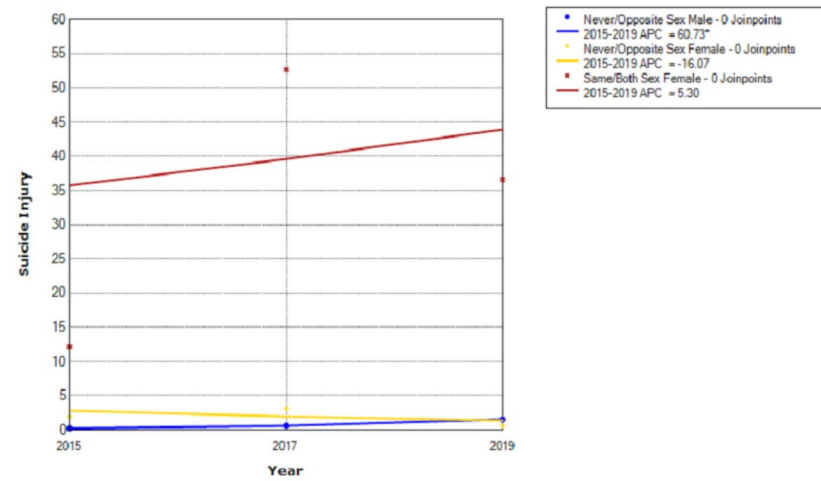

**eFigure 4.** Annual Percentage Changes for Suicidal Behaviors by Intersections of Sexual Identity and Sex of Sexual Contacts

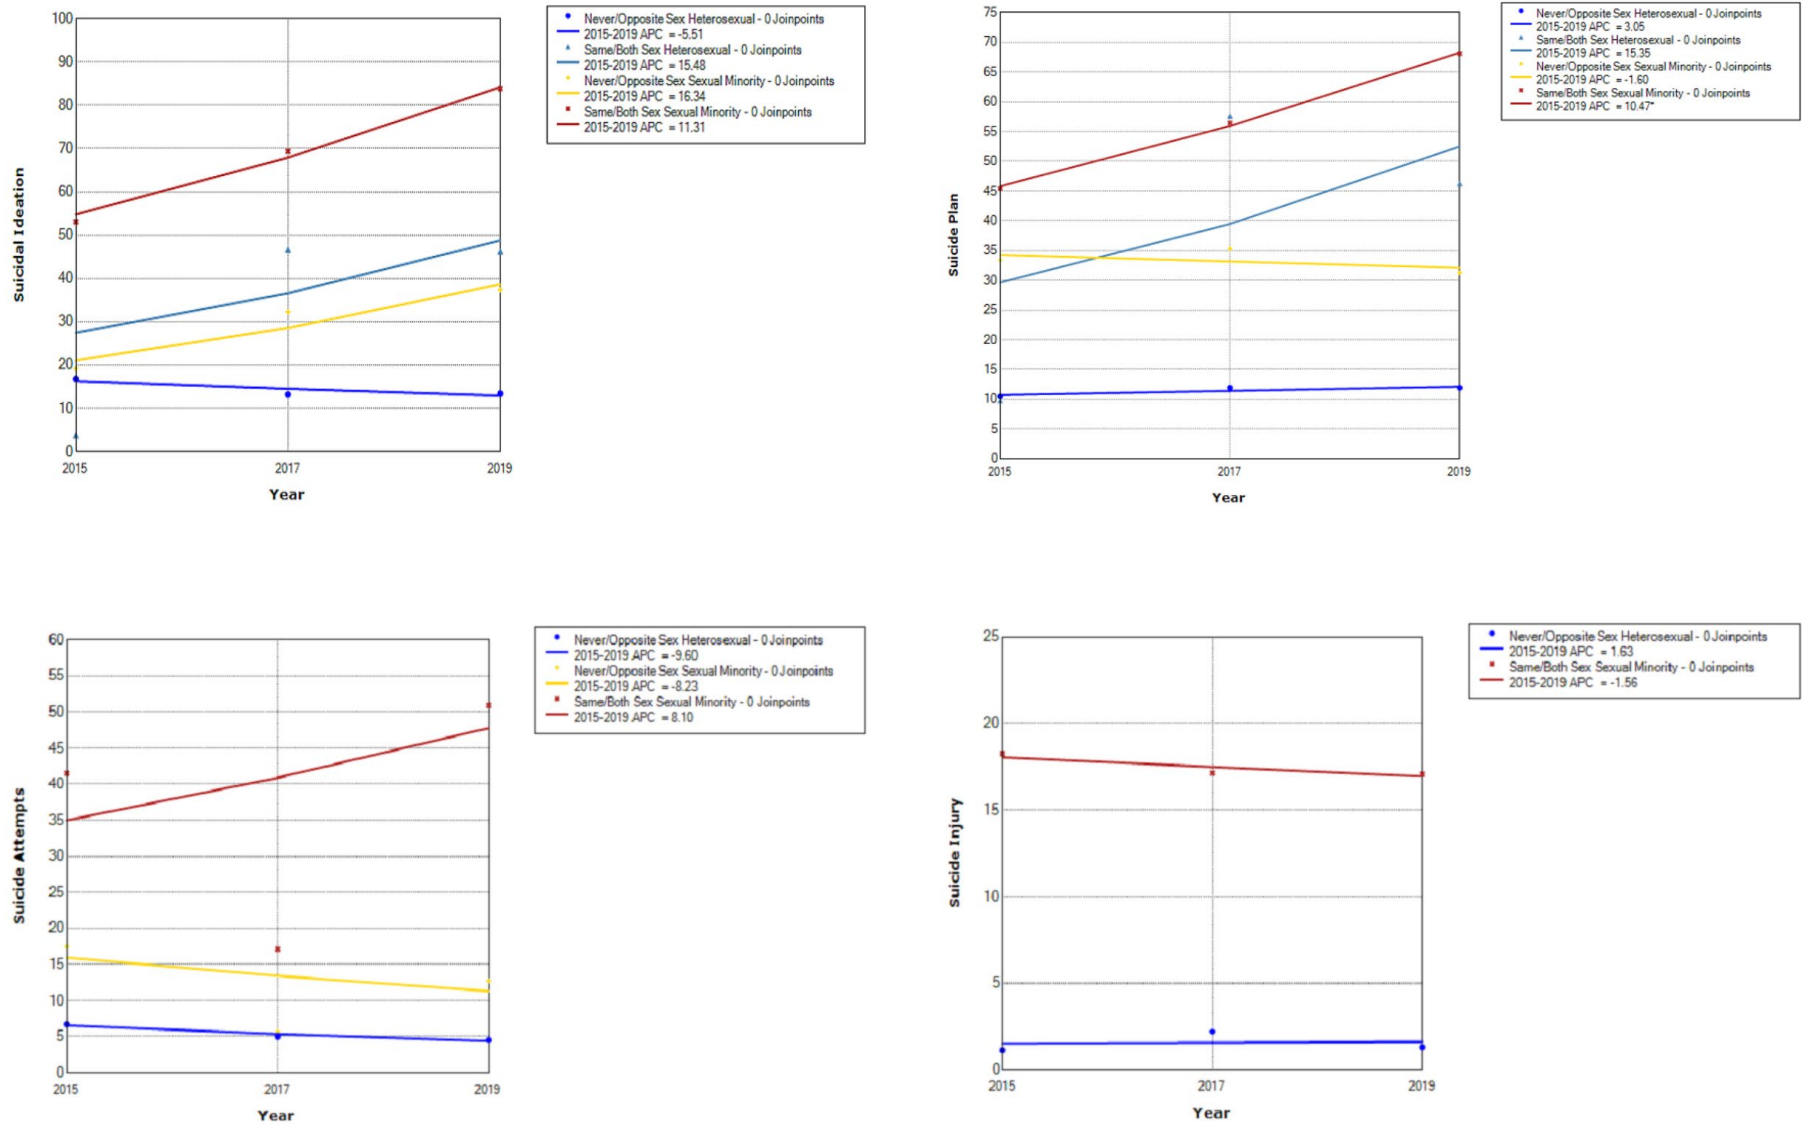

Supplement: jamanetwopen-e214498-s001.pdf [file jamanetwopen-e214498-s001.pdf]
